# Supplementary material for: A Climate Data Record of Stratospheric Aerosols
Source: Copernicus journal article supplement (doi:10.5194/essd-2023-538), 2024-03-27
Supplement: Supplementary file 1 [file essd-2023-538-supplement.pdf]

# Supplement to the paper "Climate data record of stratospheric aerosols"

## 1 Illustrations of original, adjusted and merged time series of stratospheric aerosol profiles

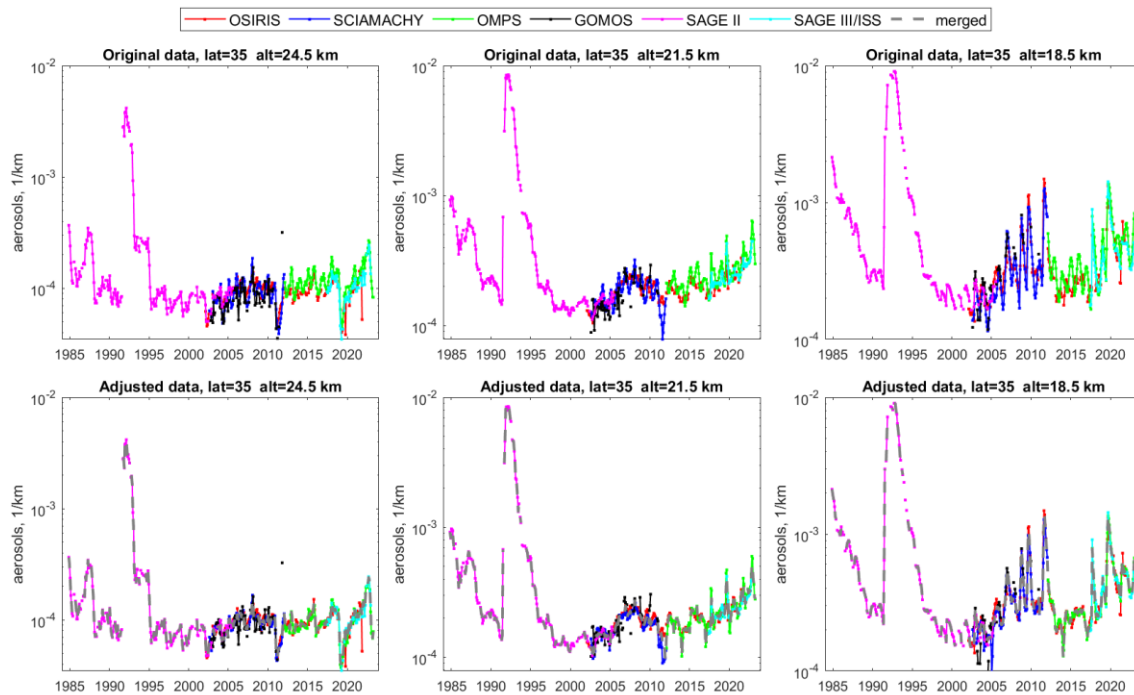

Figure S1. Aerosol extinction coefficient (1/km) at several altitudes in the subtropics (30°-40° N). Colored lines correspond to aerosol records from individual instruments. Top panel: original data, bottom panel: adjusted data. The merged aerosol extinction coefficient is shown by grey line in the bottom panel.

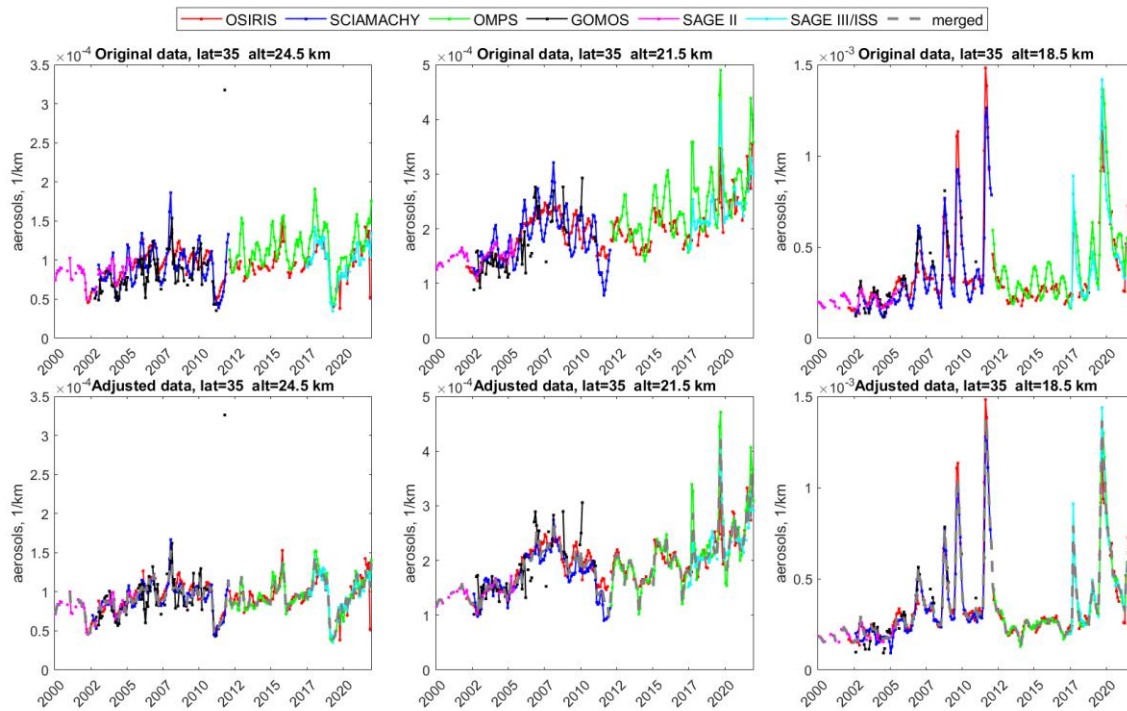

Figure S2. As Figure S1, but with the zoom on years 2000-2021.

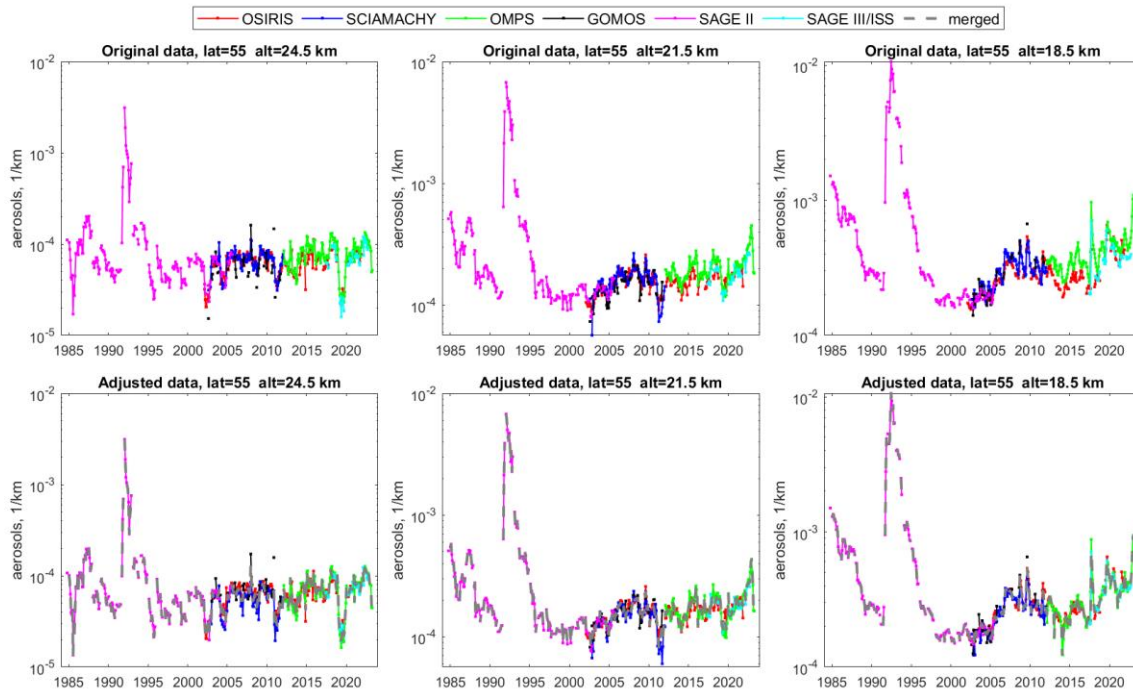

Figure S3. As Figure S1, but for NH mid-latitudes (50°-60° N).

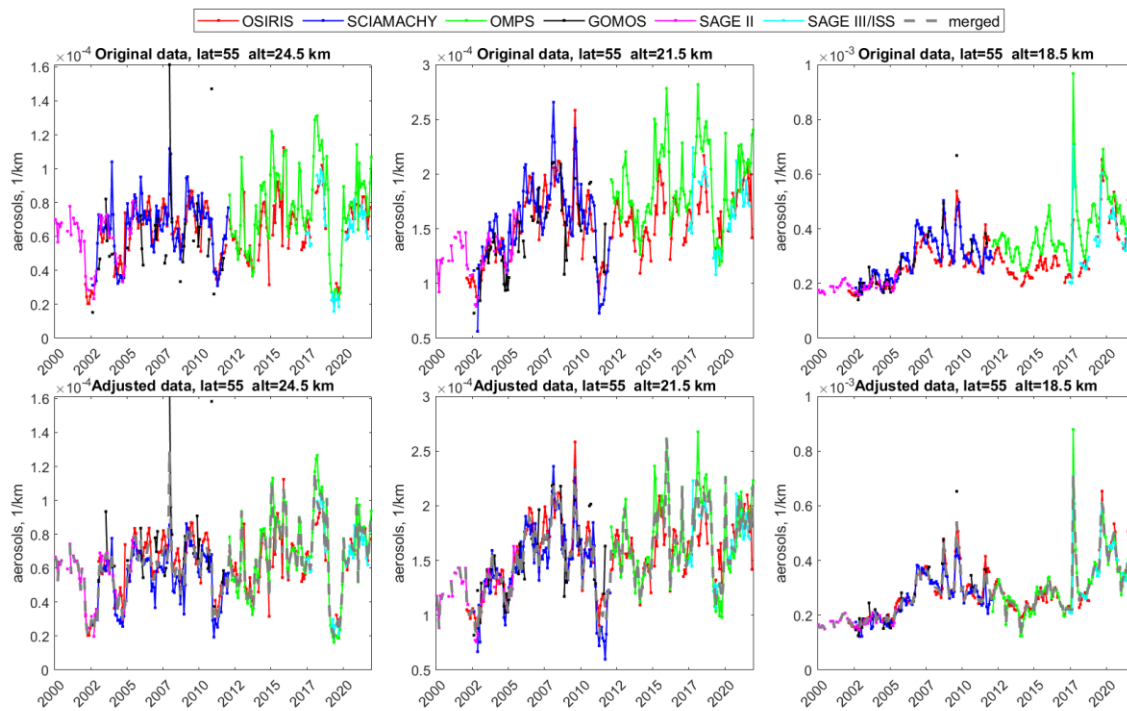

Figure S 4. As Figure S3, but with the zoom on years 2000-2021
