# Supplementary material for: A Climate Data Record of Stratospheric Aerosols
Source: Copernicus journal article supplement (doi:10.5194/essd-2023-538), 2024-03-27
Supplement: Supplementary file [file essd-2023-538-AC2-supplement.pdf]

Dear Dr. Wilson,

Thank you very much for your positive evaluation of our paper. We took your comments into account in the revised version of the manuscript. Please find below our detailed replies (black font) on your comments (blue font).

My only difficulty with this dataset is that there is a discussion of how uncertainties are calculated, but I cannot find these anywhere in the dataset itself. I had expected each dataset to be matched with an uncertainty estimate. Am I missing something here? A clarification on this would strengthen the usefulness of the dataset.

The updated version of the dataset includes uncertainties for each provided dataset, except for the global AOD proxy. This version is uploaded, and it can be accessed from the same link.

There are only a couple of minor technical issues that I noticed that am sure will get corrected. (Line 167 two full stops; highlighting in the "Data availability" section.

Corrected.
